# Supplementary material
Source: MDPI journal article supplement (https://www.mdpi.com/1424-2818/13/2/93)
Supplement: s1 [file s1]

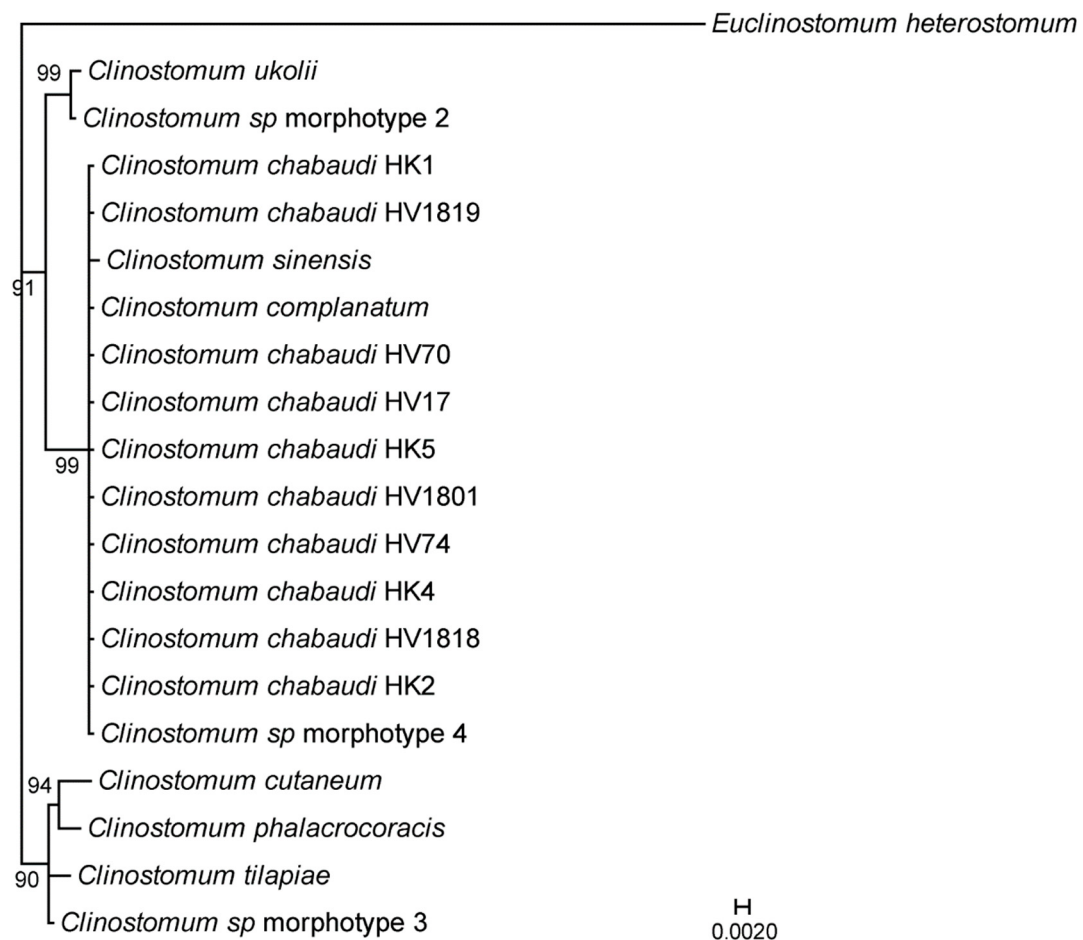

Figure S1. Bayesian tree of ITS1-5.8rDNA-ITS2 sequence from African *Clinostomum* species. The South American *Euclinostomum heterostomum* is used as outgroup. Posterior probability values are indicated. Scale bar gives substitutions per site.
